# Supplementary material
Source: PubMed Central journal article supplement (PMC4173673)
Supplement: rspb20140984supp2.pdf [file rspb20140984supp2.pdf]

Supplementary material, Table S1

**Table S1.** The 57 species considered in the analysis and their migration flyway designations: Eastern (E), Central (C), and Western (W).

| Common name                  | Scientific name                  | Family       | Flyway |
|------------------------------|----------------------------------|--------------|--------|
| Acadian Flycatcher           | <i>Empidonax vireescens</i>      | Tyrannidae   | E      |
| Black-and-white Warbler      | <i>Mniotilta varia</i>           | Parulidae    | E      |
| Black-throated Blue Warbler  | <i>Setophaga caerulescens</i>    | Parulidae    | E      |
| Black-throated Green Warbler | <i>Setophaga virens</i>          | Parulidae    | E      |
| Blackburnian Warbler         | <i>Setophaga fusca</i>           | Parulidae    | E      |
| Blue-winged Warbler          | <i>Vermivora cyanoptera</i>      | Parulidae    | E      |
| Broad-winged Hawk            | <i>Buteo platypterus</i>         | Accipitridae | E      |
| Chestnut-sided Warbler       | <i>Setophaga pensylvanica</i>    | Parulidae    | E      |
| Chimney Swift                | <i>Chaetura pelagica</i>         | Apodidae     | E      |
| Eastern Wood-Pewee           | <i>Contopus virens</i>           | Tyrannidae   | E      |
| Great Crested Flycatcher     | <i>Myiarchus crinitus</i>        | Tyrannidae   | E      |
| Kentucky Warbler             | <i>Geothlypis formosa</i>        | Parulidae    | E      |
| Louisiana Waterthrush        | <i>Parkesia motacilla</i>        | Parulidae    | E      |
| Mourning Warbler             | <i>Geothlypis philadelphia</i>   | Parulidae    | E      |
| Northern Parula              | <i>Setophaga americana</i>       | Parulidae    | E      |
| Ovenbird                     | <i>Seiurus aurocapilla</i>       | Parulidae    | E      |
| Prairie Warbler              | <i>Setophaga discolor</i>        | Parulidae    | E      |
| Prothonotary Warbler         | <i>Protonotaria citrea</i>       | Parulidae    | E      |
| Ruby-throated Hummingbird    | <i>Archilochus colubris</i>      | Trochilidae  | E      |
| Scarlet Tanager              | <i>Piranga olivacea</i>          | Cardinalidae | E      |
| Wood Thrush                  | <i>Hylocichla mustelina</i>      | Turdidae     | E      |
| Worm-eating Warbler          | <i>Helmitheros vermivorum</i>    | Parulidae    | E      |
| Yellow-billed Cuckoo         | <i>Coccyzus americanus</i>       | Cuculidae    | E      |
| Yellow-throated Vireo        | <i>Vireo flavifrons</i>          | Vireonidae   | E      |
| Yellow-throated Warbler      | <i>Setophaga dominica</i>        | Parulidae    | E      |
| Baltimore Oriole             | <i>Icterus galbula</i>           | Icteridae    | C      |
| Bank Swallow                 | <i>Riparia riparia</i>           | Hirundinidae | C      |
| Clay-colored Sparrow         | <i>Spizella pallida</i>          | Emberizidae  | C      |
| Dickcissel                   | <i>Spiza americana</i>           | Cardinalidae | C      |
| Least Flycatcher             | <i>Empidonax minimus</i>         | Tyrannidae   | C      |
| Orchard Oriole               | <i>Icterus spurius</i>           | Icteridae    | C      |
| Ash-throated Flycatcher      | <i>Myiarchus cinerascens</i>     | Tyrannidae   | W      |
| Black-chinned Hummingbird    | <i>Archilochus alexandri</i>     | Trochilidae  | W      |
| Black-headed Grosbeak        | <i>Pheucticus melanocephalus</i> | Cardinalidae | W      |
| Black-throated Gray Warbler  | <i>Setophaga nigrescens</i>      | Parulidae    | W      |
| Broad-tailed Hummingbird     | <i>Selasphorus platycercus</i>   | Trochilidae  | W      |
| Bullock's Oriole             | <i>Icterus bullockii</i>         | Icteridae    | W      |
| Calliope Hummingbird         | <i>Stellula calliope</i>         | Trochilidae  | W      |
| Cassin's Vireo               | <i>Vireo cassinii</i>            | Vireonidae   | W      |
| Cordilleran Flycatcher       | <i>Empidonax occidentalis</i>    | Tyrannidae   | W      |

| Common name              | Scientific name               | Family       | Flyway |
|--------------------------|-------------------------------|--------------|--------|
| Dusky Flycatcher         | <i>Empidonax oberholseri</i>  | Tyrannidae   | W      |
| Hammond's Flycatcher     | <i>Empidonax hammondii</i>    | Tyrannidae   | W      |
| Hermit Warbler           | <i>Setophaga occidentalis</i> | Parulidae    | W      |
| Lazuli Bunting           | <i>Passerina amoena</i>       | Cardinalidae | W      |
| MacGillivray's Warbler   | <i>Geothlypis tolmiei</i>     | Parulidae    | W      |
| Olive-sided Flycatcher   | <i>Contopus cooperi</i>       | Tyrannidae   | W      |
| Pacific-slope Flycatcher | <i>Empidonax difficilis</i>   | Tyrannidae   | W      |
| Plumbeous Vireo          | <i>Vireo plumbeus</i>         | Vireonidae   | W      |
| Rufous Hummingbird       | <i>Selasphorus rufus</i>      | Trochilidae  | W      |
| Scott's Oriole           | <i>Icterus parisorum</i>      | Icteridae    | W      |
| Townsend's Warbler       | <i>Setophaga townsendi</i>    | Parulidae    | W      |
| Vaux's Swift             | <i>Chaetura vauxi</i>         | Apodidae     | W      |
| Violet-green Swallow     | <i>Tachycineta thalassina</i> | Hirundinidae | W      |
| Virginia's Warbler       | <i>Oreothlypis virginiae</i>  | Parulidae    | W      |
| Western Kingbird         | <i>Tyrannus verticalis</i>    | Tyrannidae   | W      |
| Western Tanager          | <i>Piranga ludoviciana</i>    | Cardinalidae | W      |
| Western Wood-Pewee       | <i>Contopus sordidulus</i>    | Tyrannidae   | W      |
